# Supplementary material for: Marine mammal skin microbiotas are influenced by host phylogeny
Source: R Soc Open Sci. 2020 May 20;7(5):192046. doi: 10.1098/rsos.192046 (PMC7277249; doi:10.1098/rsos.192046)
Supplement: Supplementary Table 1 [file RSOS192046supp1.xlsx]

## Sheet: Sample metadata
Supplementary Table 1. List of samples and metadata included in the analyses.
Sample	Host common name	Host latin name	Sex	Life stage	Reproductive status	Collection Date	Latitude	Longitude	Condition	Host family	Location	Number of sequences used in the analyses	Collection organization
RWB2011OCT31.03.1273067	Bottlenose_dolphin	Tursiops_truncatus	unknown	adult	unknown	October_2011	LAT_19.63999	LONG_155.99693	free_ranging	Delphinidae	Pacific	9577	Cascadia Research Collective
RWB2011OCT31.04.1273095	Bottlenose_dolphin	Tursiops_truncatus	unknown	adult	unknown	October_2011	LAT_19.63999	LONG_155.99693	free_ranging	Delphinidae	Pacific	20868	Cascadia Research Collective
RWB2011OCT31.02.1272978	Bottlenose_dolphin	Tursiops_truncatus	unknown	adult	unknown	October_2011	LAT_19.63999	LONG_155.99693	free_ranging	Delphinidae	Pacific	41604	Cascadia Research Collective
CCS2011.012.1273077	Fin_whale	Balaenoptera_physalus	unknown	unknown	unknown	June_2011	LAT_41.67293	LONG_70.33909	free_ranging	Balaenopteridae	Atlantic	18236	Center for Coastal Studies
CCS2010.023.1273134	Fin_whale	Balaenoptera_physalus	female	adult	unknown	June_2010	LAT_41.67293	LONG_70.33909	free_ranging	Balaenopteridae	Atlantic	18606	Center for Coastal Studies
CCS2012.006.1272968	Fin_whale	Balaenoptera_physalus	female	adult	unknown	March_2012	LAT_41.67293	LONG_70.33909	free_ranging	Balaenopteridae	Atlantic	20750	Center for Coastal Studies
CCS2012.008.1273054	Fin_whale	Balaenoptera_physalus	unknown	unknown	unknown	April_2012	LAT_41.67293	LONG_70.33909	free_ranging	Balaenopteridae	Atlantic	24773	Center for Coastal Studies
CCS2012.050.1272995	Fin_whale	Balaenoptera_physalus	unknown	unknown	unknown	October_2012	LAT_41.67293	LONG_70.33909	free_ranging	Balaenopteridae	Atlantic	27112	Center for Coastal Studies
CCS2012.004.1272966	Fin_whale	Balaenoptera_physalus	unknown	unknown	unknown	March_2012	LAT_41.67293	LONG_70.33909	free_ranging	Balaenopteridae	Atlantic	27582	Center for Coastal Studies
CCS2012.002.1272969	Fin_whale	Balaenoptera_physalus	unknown	unknown	unknown	February_2012	LAT_41.67293	LONG_70.33909	free_ranging	Balaenopteridae	Atlantic	28977	Center for Coastal Studies
CCS2009.025.1272985	Fin_whale	Balaenoptera_physalus	unknown	unknown	unknown	January_2009	LAT_41.67293	LONG_70.33909	free_ranging	Balaenopteridae	Atlantic	35188	Center for Coastal Studies
CCS2010.024.1273093	Fin_whale	Balaenoptera_physalus	unknown	calf	unknown	June_2010	LAT_41.67293	LONG_70.33909	free_ranging	Balaenopteridae	Atlantic	41350	Center for Coastal Studies
CCS2011.007.1273058	Fin_whale	Balaenoptera_physalus	unknown	unknown	unknown	May_2011	LAT_41.67293	LONG_70.33909	free_ranging	Balaenopteridae	Atlantic	53188	Center for Coastal Studies
CCS2012.007.1273036	Fin_whale	Balaenoptera_physalus	unknown	adult	unknown	April_2012	LAT_41.67293	LONG_70.33909	free_ranging	Balaenopteridae	Atlantic	63581	Center for Coastal Studies
CCS2012.005.1273020	Fin_whale	Balaenoptera_physalus	unknown	unknown	unknown	March_2012	LAT_41.67293	LONG_70.33909	free_ranging	Balaenopteridae	Atlantic	64782	Center for Coastal Studies
CCS2012.003.1273133	Fin_whale	Balaenoptera_physalus	unknown	unknown	unknown	March_2012	LAT_41.67293	LONG_70.33909	free_ranging	Balaenopteridae	Atlantic	88740	Center for Coastal Studies
CCS2009.007.1272952	Fin_whale	Balaenoptera_physalus	female	unknown	unknown	April_2009	LAT_41.67293	LONG_70.33909	free_ranging	Balaenopteridae	Atlantic	93535	Center for Coastal Studies
CCS2009.098.1273025	Fin_whale	Balaenoptera_physalus	unknown	unknown	unknown	November_2009	LAT_41.67293	LONG_70.33909	free_ranging	Balaenopteridae	Atlantic	140191	Center for Coastal Studies
flipper.tag.46.1273075	Harbor_seal	Phoca_vitulina	female	juvenile	unknown	April_2012	LAT_44.10369	LONG_69.10893	free_ranging	Phocidae	Atlantic	3778	NOAA Northeast Fisheries Science Center
flipper.tag.24.1273118	Harbor_seal	Phoca_vitulina	male	adult	unknown	March_2012	LAT_41.68209	LONG_69.95977	free_ranging	Phocidae	Atlantic	8831	NOAA Northeast Fisheries Science Center
flipper.tag.41.1273050	Harbor_seal	Phoca_vitulina	female	juvenile	unknown	April_2012	LAT_44.10369	LONG_69.10893	free_ranging	Phocidae	Atlantic	9962	NOAA Northeast Fisheries Science Center
flipper.tag.50.1273123	Harbor_seal	Phoca_vitulina	female	juvenile	unknown	April_2012	LAT_44.10369	LONG_69.10893	free_ranging	Phocidae	Atlantic	24912	NOAA Northeast Fisheries Science Center
flipper.tag.23.1273102	Harbor_seal	Phoca_vitulina	male	adult	unknown	March_2012	LAT_41.68209	LONG_69.95977	free_ranging	Phocidae	Atlantic	25969	NOAA Northeast Fisheries Science Center
flipper.tag.44.1273023	Harbor_seal	Phoca_vitulina	female	juvenile	unknown	April_2012	LAT_44.10369	LONG_69.10893	free_ranging	Phocidae	Atlantic	26754	NOAA Northeast Fisheries Science Center
flipper.tag.49.1273138	Harbor_seal	Phoca_vitulina	female	adult	unknown	April_2012	LAT_44.10369	LONG_69.10893	free_ranging	Phocidae	Atlantic	28624	NOAA Northeast Fisheries Science Center
flipper.tag.47.1273081	Harbor_seal	Phoca_vitulina	male	adult	unknown	April_2012	LAT_44.10369	LONG_69.10893	free_ranging	Phocidae	Atlantic	31069	NOAA Northeast Fisheries Science Center
flipper.tag.35.1272992	Harbor_seal	Phoca_vitulina	female	adult	unknown	March_2012	LAT_41.68209	LONG_69.95977	free_ranging	Phocidae	Atlantic	32122	NOAA Northeast Fisheries Science Center
flipper.tag.45.1272987	Harbor_seal	Phoca_vitulina	female	adult	unknown	April_2012	LAT_44.10369	LONG_69.10893	free_ranging	Phocidae	Atlantic	33449	NOAA Northeast Fisheries Science Center
flipper.tag.51.1273019	Harbor_seal	Phoca_vitulina	unknown	unknown	unknown	None	LAT_41.67293	LONG_70.33909	free_ranging	Phocidae	Atlantic	38027	NOAA Northeast Fisheries Science Center
flipper.tag.43.1273037	Harbor_seal	Phoca_vitulina	male	juvenile	unknown	April_2012	LAT_44.10369	LONG_69.10893	free_ranging	Phocidae	Atlantic	39803	NOAA Northeast Fisheries Science Center
flipper.tag.29.1272973	Harbor_seal	Phoca_vitulina	male	adult	unknown	March_2012	LAT_41.68209	LONG_69.95977	free_ranging	Phocidae	Atlantic	40646	NOAA Northeast Fisheries Science Center
flipper.tag.33.1273055	Harbor_seal	Phoca_vitulina	female	adult	unknown	March_2012	LAT_41.68209	LONG_69.95977	free_ranging	Phocidae	Atlantic	45668	NOAA Northeast Fisheries Science Center
flipper.tag.26.1272955	Harbor_seal	Phoca_vitulina	male	adult	unknown	March_2012	LAT_41.68209	LONG_69.95977	free_ranging	Phocidae	Atlantic	60252	NOAA Northeast Fisheries Science Center
flipper.tag.28.1273101	Harbor_seal	Phoca_vitulina	female	adult	unknown	March_2012	LAT_41.68209	LONG_69.95977	free_ranging	Phocidae	Atlantic	86741	NOAA Northeast Fisheries Science Center
flipper.tag.27.1273012	Harbor_seal	Phoca_vitulina	female	adult	unknown	March_2012	LAT_41.68209	LONG_69.95977	free_ranging	Phocidae	Atlantic	87760	NOAA Northeast Fisheries Science Center
flipper.tag.34.1273109	Harbor_seal	Phoca_vitulina	female	adult	unknown	March_2012	LAT_41.68209	LONG_69.95977	free_ranging	Phocidae	Atlantic	114045	NOAA Northeast Fisheries Science Center
flipper.tag.40.1272953	Harbor_seal	Phoca_vitulina	male	juvenile	unknown	April_2012	LAT_44.10369	LONG_69.10893	free_ranging	Phocidae	Atlantic	254186	NOAA Northeast Fisheries Science Center
flipper.tag.42.1272986	Harbor_seal	Phoca_vitulina	male	juvenile	unknown	April_2012	LAT_44.10369	LONG_69.10893	free_ranging	Phocidae	Atlantic	283679	NOAA Northeast Fisheries Science Center
flipper.tag.39.1273079	Harbor_seal	Phoca_vitulina	male	adult	unknown	April_2012	LAT_44.10369	LONG_69.10893	free_ranging	Phocidae	Atlantic	296178	NOAA Northeast Fisheries Science Center
RWB2012DEC18.01.1273088	Melon_headed_whale	Peponocephala_electra	unknown	sub_adult	unknown	December_2012	LAT_20.8166	LONG_156.92732	free_ranging	Delphinidae	Pacific	3784	Cascadia Research Collective
RWB2012DEC18.07.1273033	Melon_headed_whale	Peponocephala_electra	unknown	adult	unknown	December_2012	LAT_20.8166	LONG_156.92732	free_ranging	Delphinidae	Pacific	4947	Center for Coastal Studies
RWB2011NOV04.01.1272957	Pantropical_spotted_dolphin	Stenella_attenuata	unknown	adult	unknown	November_2011	LAT_19.63999	LONG_155.99693	free_ranging	Delphinidae	Pacific	6262	Cascadia Research Collective
RWB2011NOV12.01.1273125	Pantropical_spotted_dolphin	Stenella_attenuata	unknown	adult	unknown	November_2011	LAT_19.63999	LONG_155.99693	free_ranging	Delphinidae	Pacific	6941	Cascadia Research Collective
RWB2011OCT25.03.1273028	Pantropical_spotted_dolphin	Stenella_attenuata	unknown	adult	unknown	October_2011	LAT_19.63999	LONG_155.99693	free_ranging	Delphinidae	Pacific	7338	Cascadia Research Collective
RWB2011OCT25.02.1273076	Pantropical_spotted_dolphin	Stenella_attenuata	unknown	adult	unknown	October_2011	LAT_19.63999	LONG_155.99693	free_ranging	Delphinidae	Pacific	10049	Cascadia Research Collective
RWB2011NOV03.01.1273084	Pantropical_spotted_dolphin	Stenella_attenuata	unknown	adult	unknown	November_2011	LAT_19.63999	LONG_155.99693	free_ranging	Delphinidae	Pacific	19913	Cascadia Research Collective
RWB2011NOV08.01.1273080	Pantropical_spotted_dolphin	Stenella_attenuata	unknown	adult	unknown	November_2011	LAT_19.63999	LONG_155.99693	free_ranging	Delphinidae	Pacific	31133	Cascadia Research Collective
RWB2012AUG23.02.1273120	Rough_toothed_dolphin	Steno_bredanensis	unknown	adult	unknown	August_2012	LAT_19.63999	LONG_155.99693	free_ranging	Delphinidae	Pacific	3292	Cascadia Research Collective
RWB2012AUG10.01.1273126	Rough_toothed_dolphin	Steno_bredanensis	unknown	sub_adult	unknown	August_2012	LAT_19.63999	LONG_155.99693	free_ranging	Delphinidae	Pacific	4498	Cascadia Research Collective
JMA2012AUG19.03.1272979	Rough_toothed_dolphin	Steno_bredanensis	unknown	adult	unknown	August_2012	LAT_19.63999	LONG_155.99693	free_ranging	Delphinidae	Pacific	5352	Cascadia Research Collective
RWB2011OCT22.WW.01.1273000	Rough_toothed_dolphin	Steno_bredanensis	unknown	adult	unknown	October_2011	LAT_19.63999	LONG_155.99693	free_ranging	Delphinidae	Pacific	12648	Cascadia Research Collective
CCS2004.67.1273060	Sei_whale	Balaenoptera_borealis	unknown	unknown	unknown	August_2004	LAT_41.67293	LONG_70.33909	free_ranging	Balaenopteridae	Atlantic	3424	Center for Coastal Studies
CCS2003.196.1273066	Sei_whale	Balaenoptera_borealis	unknown	unknown	unknown	October_2003	LAT_41.67293	LONG_70.33909	free_ranging	Balaenopteridae	Atlantic	5133	Center for Coastal Studies
CCS2004.64.1273068	Sei_whale	Balaenoptera_borealis	unknown	unknown	unknown	August_2004	LAT_41.67293	LONG_70.33909	free_ranging	Balaenopteridae	Atlantic	16836	Center for Coastal Studies
RWB2012AUG16.07.1273024	Short_finned_pilot_whale	Globicephala_macrorhynchus	unknown	sub_adult	unknown	August_2012	LAT_19.63999	LONG_155.99693	free_ranging	Delphinidae	Pacific	3040	Cascadia Research Collective
JMA2012AUG11.03.1273016	Short_finned_pilot_whale	Globicephala_macrorhynchus	male	adult	unknown	August_2012	LAT_19.63999	LONG_155.99693	free_ranging	Delphinidae	Pacific	3507	Cascadia Research Collective
RWB2012DEC09.06.1273119	Short_finned_pilot_whale	Globicephala_macrorhynchus	male	adult	unknown	December_2012	LAT_20.8166	LONG_156.92732	free_ranging	Delphinidae	Pacific	3822	Cascadia Research Collective
JMA2012AUG12.01.1272963	Short_finned_pilot_whale	Globicephala_macrorhynchus	male	adult	unknown	August_2012	LAT_19.63999	LONG_155.99693	free_ranging	Delphinidae	Pacific	3895	Cascadia Research Collective
RWB2012DEC15.01.1273115	Short_finned_pilot_whale	Globicephala_macrorhynchus	female	adult	unknown	December_2012	LAT_20.8166	LONG_156.92732	free_ranging	Delphinidae	Pacific	4583	Cascadia Research Collective
JMA2012AUG18.01.1273094	Short_finned_pilot_whale	Globicephala_macrorhynchus	unknown	adult	unknown	August_2012	LAT_19.63999	LONG_155.99693	free_ranging	Delphinidae	Pacific	6385	Cascadia Research Collective
JMA2012AUG17.05.1272991	Short_finned_pilot_whale	Globicephala_macrorhynchus	female	sub_adult	unknown	August_2012	LAT_19.63999	LONG_155.99693	free_ranging	Delphinidae	Pacific	8469	Cascadia Research Collective
JMA2012AUG20.01.1273056	Short_finned_pilot_whale	Globicephala_macrorhynchus	female_probable	adult	unknown	August_2012	LAT_19.63999	LONG_155.99693	free_ranging	Delphinidae	Pacific	10386	Cascadia Research Collective
RWB2012AUG16.02.1273105	Short_finned_pilot_whale	Globicephala_macrorhynchus	male	adult	unknown	August_2012	LAT_19.63999	LONG_155.99693	free_ranging	Delphinidae	Pacific	11490	Cascadia Research Collective
JMA2012AUG22.02.1273070	Short_finned_pilot_whale	Globicephala_macrorhynchus	unknown	adult	unknown	August_2012	LAT_19.63999	LONG_155.99693	free_ranging	Delphinidae	Pacific	11569	Cascadia Research Collective
JMA2012AUG11.02.1273136	Short_finned_pilot_whale	Globicephala_macrorhynchus	unknown	adult	unknown	August_2012	LAT_19.63999	LONG_155.99693	free_ranging	Delphinidae	Pacific	11831	Cascadia Research Collective
JMA2012AUG17.03.1273008	Short_finned_pilot_whale	Globicephala_macrorhynchus	unknown	adult	unknown	August_2012	LAT_19.63999	LONG_155.99693	free_ranging	Delphinidae	Pacific	12408	Cascadia Research Collective
RWB2012AUG16.05.1273005	Short_finned_pilot_whale	Globicephala_macrorhynchus	unknown	sub_adult	unknown	August_2012	LAT_19.63999	LONG_155.99693	free_ranging	Delphinidae	Pacific	19986	Cascadia Research Collective
RWB2012AUG16.06.1273051	Short_finned_pilot_whale	Globicephala_macrorhynchus	male	adult	unknown	August_2012	LAT_19.63999	LONG_155.99693	free_ranging	Delphinidae	Pacific	29735	Cascadia Research Collective
JMA2012AUG17.01.1273112	Short_finned_pilot_whale	Globicephala_macrorhynchus	unknown	adult	unknown	August_2012	LAT_19.63999	LONG_155.99693	free_ranging	Delphinidae	Pacific	166149	Cascadia Research Collective
RWB20110CT20.WW.01.1273040	Sperm_whale	Physeter_macrocephalus	unknown	adult	unknown	October_2011	LAT_19.63999	LONG_155.99693	free_ranging	Physeteridae	Pacific	11099	Cascadia Research Collective
RWB2013MAY22.02.1273121	Sperm_whale	Physeter_macrocephalus	unknown	sub_adult	unknown	May_2013	LAT_19.63999	LONG_155.99693	free_ranging	Physeteridae	Pacific	23797	Cascadia Research Collective
RWB2011OCT20.WW.02.1273041	Sperm_whale	Physeter_macrocephalus	unknown	adult	unknown	October_2011	LAT_19.63999	LONG_155.99693	free_ranging	Physeteridae	Pacific	41324	Cascadia Research Collective
RWB2013MAY16.02.1273114	Sperm_whale	Physeter_macrocephalus	female_probable	adult	unknown	May_2013	LAT_19.63999	LONG_155.99693	free_ranging	Physeteridae	Pacific	58116	Cascadia Research Collective
RWB2013MAY16.01.1273048	Sperm_whale	Physeter_macrocephalus	female_probable	adult	unknown	May_2013	LAT_19.63999	LONG_155.99693	free_ranging	Physeteridae	Pacific	79022	Cascadia Research Collective
RWB2013MAY22.03.1273140	Sperm_whale	Physeter_macrocephalus	male	adult	unknown	May_2013	LAT_19.63999	LONG_155.99693	free_ranging	Physeteridae	Pacific	86854	Cascadia Research Collective
